# Supplementary material for: De novo discovery of mutated driver pathways in cancer
Source: HighWire-hosted journal article supplement (doi:10.1101/gr.120477.111), 2011-06-07
Supplement: Vandin120477_Supplement.pdf [file Vandin120477_Supplement.pdf]

# Supplemental Material

## A Hardness Proofs

**Theorem 6.** *The Maximum Coverage Exclusive Submatrix Problem is NP-hard.*

*Proof.* Given a mutation matrix  $A$  and an integer  $k > 0$ , the Maximum Coverage Exclusive Submatrix Problem requires to find the  $m \times k$  column submatrix  $\hat{M}$  with the largest number of non-zero rows. We prove it is NP-Hard by reduction from the Maximum Weight Independent Set Problem. We consider the Maximum Weight Independent Set Problem with positive integer weights, that is again NP-Hard, since an algorithm for the case of positive integers weights can be used to find a solution to the Maximum Cardinality Independent Set Problem.

In the Maximum Weight Independent Set problem we are given a graph  $G = (V, E)$ , a weight function  $w : V \rightarrow \mathbb{N}^+$ , and a value  $k > 0$ , and are asked for an independent set of size  $k$  with maximum weight. An independent set is a set  $I \subset V$  of vertices such that there is no edge between the vertices of  $I$ , i.e.  $\forall u, v \in I, u \neq v : (u, v) \notin E$ .

Given an instance for the Maximum Weight Independent Set problem we build an instance of the Maximum Coverage Exclusive Submatrix Problem as follows. The mutation matrix  $A$  has one column for each vertex  $v \in V$ . Let  $\delta(v)$  be the degree of  $v \in V$  in  $G$ , and  $\Delta = \max_{v \in V} \delta(v)$ . We define the set of rows of the mutation matrix as:  $\mathcal{S} = \{s_e : e \in E\} \cup (\cup_{v \in V} \mathcal{S}_v)$  where  $\mathcal{S}_v = \{s_v^{(1)}, s_v^{(2)}, \dots, s_v^{(\Delta - \delta(v) + w(v))}\}$ . We define  $A_{s,v} = 1$  if  $s = s_e = s_{(u,v)}$  with  $e \in E$  or if  $s \in \mathcal{S}_v$ , and  $A_{s,v} = 0$  otherwise. All these operations can be performed in polynomial time.

Note that: (i) for any two columns  $u, v \in V$ ,  $\Gamma(u) \cap \Gamma(v) \neq \emptyset$  if and only if  $(u, v) \in E$ . (ii)  $\forall v \in V$ ,  $|\Gamma(v)| = \Delta + w(v)$  (i.e., the number of rows in which column  $v$  is 1 is equal to  $\Delta + w(v)$ );

Now consider a set  $M = \{v_1, \dots, v_k\}$  of  $k$  columns. From (i) we have that column submatrix induced by  $M$  is exclusive if and only if  $M$  is an independent set of size  $k$  in  $G$ . Now, if  $M$  is an exclusive matrix, the number of non-zero rows in it is equal to  $\sum_{i=1}^k |\Gamma(v_i)|$ . From (ii) above  $\sum_{i=1}^k |\Gamma(v_i)| = k\Delta + \sum_{i=1}^k w(v_i)$ . Since  $k$  and  $\Delta$  are fixed, the exclusive column submatrix induced by  $M$  maximizes  $\sum_{i=1}^k |\Gamma(v_i)|$  if and only if  $M$  is the independent set of size that maximizes  $\sum_{i=1}^k w(v_i)$ , i.e.  $M$  is the maximum weight independent set in  $G$ .  $\square$

**Theorem 7.** *The Maximum Weight Submatrix Problem is NP-Hard.*

*Proof.* The proof is by reduction from the Independent Set Problem, a well known NP-Hard problem (Hochbaum, 1997). In the Independent Set Problem we are given a graph  $G = (V, E)$  and a value  $k$ , and we ask if there is an independent set of size  $k$  in  $G$ . An independent set for  $G$  is a set of vertices  $I \subseteq V$  such that there is no edge among the vertices of  $I$ , i.e. for all pairs  $u, v \in I, u \neq v : (u, v) \notin E$ .

Given an instance of the Independent Set Problem, we build a mutation matrix representing the instance of our problem as follows. We consider a column for each vertex  $v \in V$ . Let  $\delta(v)$  be the degree of  $v$  in  $G$ , and define  $\Delta = \max \delta(v)$ . We define the set of rows of the mutation matrix as:  $\mathcal{S} = \{s_e : e \in E\} \cup (\cup_{v \in V} \mathcal{S}_v)$  where  $\mathcal{S}_v = \{s_v^{(1)}, s_v^{(2)}, \dots, s_v^{(\Delta - \delta(v))}\}$ . We define  $A_{s,v} = 1$  if  $s = s_e = s_{(u,v)}$  with  $e \in E$  or if  $s \in \mathcal{S}_v$ , and  $A_{s,v} = 0$  otherwise. All these operations can be performed in polynomial time.

Note that: (i)  $\forall v \in V$ ,  $|\Gamma(v)| = \Delta$  (i.e., the number of non-zeros entries in column  $v$  is  $\Delta$ ); (ii) for any two vertices  $u, g \in V$ ,  $\Gamma(u) \cap \Gamma(v) \neq \emptyset$  if and only if  $(u, v) \in E$ .

Now consider a set  $M = \{v_1, \dots, v_k\}$  of  $k$  columns. From (i) we have  $\sum_{i=1}^k |\Gamma(v_k)| = k\Delta$ , and  $|\Gamma(M)| \leq k\Delta$ . From (ii) we have that  $|\Gamma(M)| = k\Delta$  if and only if  $\{v_1, v_2, \dots, v_k\}$  is an independent set of  $G$ , thus  $W(M) = k\Delta$  if and only if  $\{v_1, v_2, \dots, v_k\}$  is an independent set of  $G$ . If we can solve the Maximum Weight Genes Set Problem on  $A$ , we can then solve the Independent Set Problem on  $G$ .  $\square$

## B Analysis of Greedy Algorithm

In this section we give a proof of Theorem 3. We need to prove that: (i) the first step of the greedy algorithm is correct, i.e. the pair  $M = \{g_1, g_2\}$  of columns that maximizes  $W(M)$  is a subset of  $\hat{M}$ ; (ii) the loop in step 2 is correct, i.e. all the subsets of size  $\ell$  built in the loop are subsets of  $\hat{M}$ .

To prove (i) and (ii), we need to lower bound the weight of the subsets that we build in the loop of step 2, assuming they are the correct ones.

**Lemma 1.** *Let  $M$  be a subset of  $\hat{M}$  with  $|M| = \ell, 0 \leq \ell < k$ . If  $W(M) \geq \frac{\ell}{k} \hat{M}$ , then there exists a gene  $g \in \hat{M} \setminus M$  such that  $W(M \cup \{g\}) \geq \frac{\ell+1}{k} W(\hat{M})$ .*

*Proof.* The proof is by contradiction. Let assume that for a given  $M \subset \hat{M}$  with  $|M| = \ell < k$ , there exists no gene  $g \in \hat{M} \setminus M$  such that  $W(M \cup \{g\}) \geq \frac{\ell+1}{k} W(\hat{M})$ .

Let  $\hat{M} \setminus M = \{g_1, \dots, g_{k-\ell}\}$ , and  $M_i = M \cup \{g_1, \dots, g_i\}, i \leq k - \ell$ . Since  $W(M_{k-\ell}) \geq W(\hat{M})$  (in particular,  $W(M_{k-\ell}) = W(\hat{M})$ ), there exists  $i$  such that  $W(M_i) < \frac{\ell+i}{k} W(\hat{M})$  and  $W(M_{i+1}) \geq \frac{\ell+i+1}{k} W(\hat{M})$ . Let  $i^*$  be the minimum such  $i$ ,  $M' = M_{i^*-1}$  and  $g^* = g_{i^*}$ .

We have

$$\begin{aligned} W(M' \cup \{g^*\}) &= 2|\Gamma(M' \cup \{g^*\})| - \sum_{g \in M' \cup \{g^*\}} |\Gamma(g)| \\ &= 2|\Gamma(M')| - \sum_{g \in M'} |\Gamma(g)| + 2|\Gamma(g^*) \cap (\mathcal{S} \setminus \Gamma(M'))| - |\Gamma(g^*)| \\ &= W(M') + \Delta(M', g^*) \end{aligned}$$

where  $\Delta(M', g^*) = 2|\Gamma(g^*) \cap (\mathcal{S} \setminus \Gamma(M'))| - |\Gamma(g^*)|$ .

Now, since  $W(M' \cup \{g^*\}) = W(M') + \Delta(M', g^*) \geq \frac{\ell+i+1}{k} W(\hat{M})$  and  $W(M') < \frac{\ell+i}{k} W(\hat{M})$ , we have

$$\Delta(M', g^*) \geq \frac{\ell+i+1}{k} W(\hat{M}) - \frac{\ell+i}{k} W(\hat{M}) \geq \frac{1}{k} W(\hat{M}).$$

Moreover, since  $M \subseteq M'$ , we have  $\Gamma(M) \subseteq \Gamma(M')$ , that implies  $\Gamma(g^*) \cap (\mathcal{S} \setminus \Gamma(M')) \subseteq \Gamma(g^*) \cap (\mathcal{S} \setminus \Gamma(M))$ .

Thus

$$\Delta(M, g^*) \geq \Delta(M', g^*) \geq \frac{1}{k} W(\hat{M}),$$

that implies

$$W(M \cup \{g^*\}) = W(M) + \Delta(M, g^*) \geq \frac{\ell}{k} \hat{M} + \frac{1}{k} W(\hat{M}) \geq \frac{\ell+1}{k} W(\hat{M}),$$

that is a contradiction. □

We now prove that if the number of patients is large enough, (i) holds. Note that since in Gene Independence Model the frequency of mutation of the genes in  $\hat{M}$  and the frequency of mutation of genes not in  $\hat{M}$  can be the same, the most frequent genes are not guaranteed to be in  $\hat{M}$ . Instead we prove that if the number of patients is large enough, the greedy algorithm, that checks sets of size 2, correctly identifies a subset of  $\hat{M}$  of size 2.

**Lemma 2.** *Let  $P$  be the pair of genes in  $\hat{M}$  with the highest weight  $W(P)$ , and let  $W(\hat{M}) = rm$ . Define the event  $E = \text{"there exists a pair } \mathcal{R} \not\subseteq \hat{M} \text{ of genes such that } W(\mathcal{R}) \geq W(P)\text{"}$ . If*

$$m \geq \frac{(2 + \varepsilon)}{2[2r/k - 2(p_U - p_L^2)]^2} \log n$$

then

$$\Pr[E] \leq n^{-\varepsilon}.$$

*Proof.* Consider a pair of genes  $\mathcal{R} = \{g_i, g_j\} \not\subseteq \hat{M}$ . We can rewrite

$$W(\mathcal{R}) = X = \sum_{i=1}^m \in X_i,$$

where  $X_i$  is the random variable that counts the “contribution” of patient  $s_i \in \mathcal{S}$  to  $W(\mathcal{R})$ . Note that for all  $i$  we have  $X_i \in \{0, 1\}$ , since when only one gene in  $\mathcal{R}$  is mutated the contribution of  $X_i$  is 1, while when none or both genes in  $\mathcal{R}$  are mutated in  $\mathcal{S}$  the contribution of  $X_i$  is 0.

Let  $p_i, p_j$  be the frequency of mutation of  $g_i, g_j$  respectively. The expectation of  $W(\mathcal{R})$  is

$$\mathbf{E}[W(\mathcal{R})] = \mathbf{E}[X] = m(p_i(1 - p_j) + p_j(1 - p_i)) \leq |\mathcal{S}|(2p_U - 2p_L^2).$$

Since the  $X_i$  are independent random variables, we can use the Chernoff bound we can then derive the probability that a particular set  $\mathcal{R}$  has  $W(\mathcal{R}) \geq \frac{2r}{k}|\mathcal{S}|$ :

$$\begin{aligned} \Pr \left[ W(\mathcal{R}) \geq \frac{2r}{k}m \right] &= \Pr \left[ W(\mathcal{R}) - \mathbf{E}[W(\mathcal{R})] \geq \frac{2r}{k}m - \mathbf{E}[W(\mathcal{R})] \right] \\ &\leq \Pr \left[ W(\mathcal{R}) - \mathbf{E}[W(\mathcal{R})] \geq \frac{2r}{k}|\mathcal{S}| - m(2p_U - 2p_L^2) \right] \\ &\leq e^{-\frac{2m^2 \left( \frac{2r}{k} - (2p_U - 2p_L^2) \right)^2}{m}}. \end{aligned}$$

Now, since  $m \geq \frac{(2+\varepsilon)}{2[2r/k - 2(p_U - p_L^2)]^2} \log n$ , we have:

$$\begin{aligned} \Pr \left[ W(\mathcal{R}) \geq \frac{2r}{k}m \right] &\leq e^{-(2+\varepsilon) \ln n} \\ &\leq n^{-(2+\varepsilon)}. \end{aligned}$$

The lemma follows by applying a union bound on all the possible pairs  $\mathcal{P}$ . □

Assume that at each step the greedy algorithm chooses a gene in  $\hat{M}$ . With  $\hat{M}_\ell$  we denote the subset of size of  $\ell$  genes of  $\hat{M}$  obtained from the procedure above. Note that this defines an order on the genes of  $\hat{M}$ : in particular, we denote with  $g_\ell$  the gene in  $\hat{M}$  added to  $\hat{M}_\ell$  in order to obtain  $\hat{M}_{\ell+1}$ . We now find a lower bound to the number of patients required to guarantee that with high probability there does not exist an iteration of the step 2 of the Greedy Algorithm in which a gene not in  $\hat{M}$  is chosen.

**Lemma 3.** *Let  $g_\ell^* = \arg \max_g W(M_\ell \cup \{g\})$ . If*

$$m \geq \frac{(2 + \varepsilon) \log n}{2 \left( \frac{r(1-d)}{k} - p_U + \frac{4rp_L}{k} \right)^2},$$

then

$$\Pr[\exists \ell : g_\ell^* \notin \hat{M}] \leq n^{-\varepsilon}.$$

*Proof.* We assume that the subset built at each step is  $\hat{M}_i \subseteq \hat{M}$ . Since at the end the theorem will hold, this assumption will be proven correct.

Consider the set  $\hat{M}_i$ , that is mutated in the set  $\Gamma(\hat{M}_i)$ . By the assumptions of the Independence Gene Model, its weight is bounded by  $W(\hat{M}_i) \leq \frac{i+d}{k}W(\hat{M})$ . Now consider a gene  $g_j \notin \hat{M}$ , with mutation frequency  $p_j \in [p_L; p_U]$ . If we now add  $g_j$  to  $\hat{M}_i$ , we have that  $g_j$  contributes 1 to  $W(\hat{M}_i \cup \{g_j\})$  for each patient in  $\mathcal{S} \setminus \Gamma(\hat{M}_i)$  in which it is mutated, and -1 for each patient in  $\Gamma(\hat{M}_i)$  in which it is mutated.

Since  $g_j$  is mutated with probability  $p_j$  in a patient, we have

$$\mathbf{E}[W(\hat{M}_i \cup \{g_j\})] = W(\hat{M}_i) + p_j(m - |\Gamma(\hat{M}_i)|) - p_j|\Gamma(\hat{M}_i)| = W(\hat{M}_i) + p_jm - 2p_j|\Gamma(\hat{M}_i)|.$$

Now, given the assumptions on  $W(\hat{M}_i)$ ,  $W(\hat{M})$ ,  $p_j$ , and since  $|\Gamma(\hat{M}_i)| \geq W(\hat{M}_i)$  we have

$$\mathbf{E}[W(\hat{M}_i \cup \{g_j\})] \leq \frac{i+d}{k}rm + p_Um - 2p_L \frac{ir}{k}m \leq m \left( \frac{i+d}{k}r + p_U - 2p_L \frac{2r}{k} \right).$$

(In the last inequality we use  $i \geq 2$ .)

Since for each patient  $s$  the absolute value of the contribution to  $W(\hat{M}_i \cup \{g_j\})$  of  $g_j$  in  $s$  is bounded by 1, we can use the Chernoff-Hoeffding bound to compute the probability that  $W(\hat{M}_i \cup \{g_j\}) \geq \frac{i+1}{k}W(\hat{M})$ :

$$\begin{aligned} \Pr \left[ W(\hat{M}_i \cup \{g_j\}) \geq \frac{i+1}{k}W(\hat{M}) \right] &\leq e^{-2 \frac{\left( \frac{i+1}{k}rm - m \left( \frac{i+d}{k}r + p_U - 2p_L \frac{2r}{k} \right) \right)^2}{m}} \\ &\leq e^{-2m \left( \frac{r(1-d)}{k} - p_U + \frac{4rp_L}{k} \right)^2}. \end{aligned}$$

Now, since  $m \geq \frac{(2+\varepsilon) \log n}{2 \left( \frac{r(1-d)}{k} - p_U + \frac{4rp_L}{k} \right)^2}$ , we have

$$\Pr \left[ W(\hat{M}_i \cup \{g_j\}) \geq \frac{i+1}{k}W(\hat{M}) \right] \leq n^{-(2+\varepsilon)}.$$

The total number of pairs  $(\hat{M}_i, g_j)$  we have to consider is bounded by  $nk \leq n^2$ , since there are  $n$  genes  $g_j \notin \hat{M}$ , and there are  $k$  sets in  $\hat{M}_i$ , since  $\hat{M}$  contains  $k$  genes. The lemma follows by union bound.  $\square$

Theorem 3 follows from Lemma 2 and Lemma 3.

## C Proof of MCMC Convergence

Our analysis applies the following simple version of path coupling adapted to our setting (see (Bubley and Dyer, 1997) and (Mitzenmacher and Upfal, 2005)):

**Theorem 8.** Let  $\phi_t = |M_t - M'_t|$ , and assume that for some constant  $0 < \beta < 1$ ,  $E[\phi_{t+1} | \phi_t = 1] \leq \beta$ , then the mixing time

$$\tau(\epsilon) \leq \frac{k \log(k\epsilon^{-1})}{1 - \beta}.$$

Using the above, we prove the following convergence result for our chain.

**Theorem 9.** The MCMC is rapidly mixing for some  $c > 0$ .

*Proof.* Let  $D = \max_{g \in \mathcal{G}} |\Gamma(g)|$ . Assume first that in the first chain  $v = y$ . The probability that the first chain performs the switch is

$$\frac{e^{cW(M-\{y\}+\{w\})}}{e^{cW(M)}} \geq e^{-c(\Gamma(y)+\Gamma(w))} \geq e^{-2cD}.$$

Similarly the probability that the second chain performs the switch is  $\geq e^{-2cD}$ . Since  $v = y$  with probability  $1/k$  we have

$$Pr(\phi_{t+1} = 0 \mid \phi_t = 1) \geq \frac{1}{k} e^{-4cD} \geq \frac{1}{k} - \frac{4cD}{k}$$

for  $4cD < 1$ . Next assume that  $v \in M \cap M'$ . We need to upper bound the probability that exactly one of the chains perform the switch (otherwise  $\phi_{t+1} = \phi_t$ ). The probability that exactly one chain performs a switch is given by

$$Q = \left| \min[1, e^{cW(M-\{v\}+\{w\})-cW(M)}] - \min[1, e^{cW(M'-\{v\}+\{w\})-cW(M')}] \right|.$$

Let  $\tilde{\Gamma}_M(v) = \Gamma(v) - \Gamma(M - \{v\})$ , i.e. patients where  $v$  is altered but no other gene in  $M$  is altered. Clearly

$$\begin{aligned} & |(W(M - \{v\} + \{w\}) - W(M)) - (W(M' - \{v\} + \{w\}) - W(M'))| \leq \\ & 2(|\tilde{\Gamma}_M(v) \cap \Gamma(z)| + |\tilde{\Gamma}_{M'}(v) \cap \Gamma(y)| + |\Gamma(w) \cap \tilde{\Gamma}_M(y)| + |\Gamma(w) \cap \tilde{\Gamma}_{M'}(z)|). \end{aligned}$$

Thus, (using  $1 - e^{-x} \leq x$  for  $x < 1$ , and  $c \leq 1/12D$ )

$$Q \leq 2c(|\tilde{\Gamma}_M(v) \cap \Gamma(z)| + |\tilde{\Gamma}_{M'}(v) \cap \Gamma(y)| + |\Gamma(w) \cap \tilde{\Gamma}_M(y)| + |\Gamma(w) \cap \tilde{\Gamma}_{M'}(z)|).$$

Summing over all choices of  $w$  and  $v \in M \cap M'$  we compute that the probability that exactly one of the chains performs a switch is bounded by  $\frac{k-1}{k} \left( \frac{4cD}{k-1} + \frac{4cD\bar{D}}{m} \right)$ , where  $\bar{D} = \frac{\sum_{g \in \mathcal{G}} |\Gamma(g)|}{n}$ . Setting  $c < \min \left\{ \frac{m}{8kD\bar{D}}, \frac{1}{16D} \right\}$  we have

$$E[\phi_{t+1} \mid \phi_t = 1] \leq 1 + 2 \frac{k-1}{k} \left( \frac{2cD}{k-1} + \frac{2cD\bar{D}}{m} \right) - \frac{1}{k} + \frac{4cD}{k} \leq \frac{1}{2}.$$

Thus, with this value of  $c$  the mixing time satisfies  $\tau(\epsilon) \leq 2k \log(k\epsilon^{-1})$ .  $\square$

How good is the sampling process with this value of  $c$  in sampling sets of significant gene mutations? Assume that (after removing the genes that appear in most patients) we have  $Dk = O(m)$ , and that we have two sets  $M$  and  $M'$  such that  $W(M) \geq \gamma W(M')$  for some  $\gamma < 1$ . In that case the sampling procedure samples  $M$  with frequency that is at least  $e^{\Omega(k)}$  larger than the frequency that it samples  $M'$ .

## D MCMC results

### D.1 Results for Lung adenocarcinoma

Table 2 reports the results obtained on the lung data with  $k = 2$  and  $k = 3$ . Table 3 reports the results for  $k = 2$  obtained after removing the set (*EGFR*, *KRAS*, *STK11*). In all tables  $k$  is the size of set,  $M$  is the set of genes,  $\tilde{\pi}(M)$  is the frequency of the set in the sample obtained with the MCMC, and  $W(M)$  is the weight of the set.

| $k$ | $\tilde{\pi}(M)$ | $W(M)$ | $M$                      |
|-----|------------------|--------|--------------------------|
| 2   | 99.9%            | 90     | <i>EGFR KRAS</i>         |
| 3   | 8.2%             | 96     | <i>STK11 EGFR KRAS</i>   |
|     | 3.2%             | 94     | <i>PRKCG EGFR KRAS</i>   |
|     | 2%               | 93     | <i>NRAS EGFR KRAS</i>    |
|     | 2%               | 93     | <i>PFTK1 EGFR KRAS</i>   |
|     | 1.8%             | 94     | <i>EPHB1 EGFR KRAS</i>   |
|     | 1.7%             | 93     | <i>MAP3K3 EGFR KRAS</i>  |
|     | 1.6%             | 92     | <i>VAV2 EGFR KRAS</i>    |
|     | 1.5%             | 92     | <i>ERBB4 EGFR KRAS</i>   |
|     | 1.4%             | 92     | <i>YES1 EGFR KRAS</i>    |
|     | 1.3%             | 92     | <i>TSC1 EGFR KRAS</i>    |
|     | 1.3%             | 93     | <i>NTRK3 EGFR KRAS</i>   |
|     | 1.2%             | 93     | <i>NF1 EGFR KRAS</i>     |
|     | 1.1%             | 92     | <i>PTK2 EGFR KRAS</i>    |
|     | 1.1%             | 92     | <i>FES EGFR KRAS</i>     |
|     | 1.1%             | 91     | <i>KLF6 EGFR KRAS</i>    |
|     | 1.1%             | 92     | <i>PAK6 EGFR KRAS</i>    |
|     | 1.1%             | 91     | <i>AURKB EGFR KRAS</i>   |
|     | 1.1%             | 92     | <i>EPHA3 EGFR KRAS</i>   |
|     | 1%               | 92     | <i>TP73L EGFR KRAS</i>   |
|     | 1%               | 91     | <i>TERT EGFR KRAS</i>    |
|     | 1%               | 91     | <i>MG EGFR KRAS</i>      |
|     | 1%               | 92     | <i>CYSLTR2 EGFR KRAS</i> |
|     | 1%               | 90     | <i>FLT4 EGFR KRAS</i>    |

**Table 2:** Results for Lung mutation data with  $k = 2$  and  $k = 3$ .  $M$  is the set of genes,  $\tilde{\pi}(M)$  is the frequency of the set in the sample obtained with the MCMC, and  $W(M)$  is the weight of the set.  $MG$  is a metagene containing: *ACVR2B*, *MAP2K5*, *RPS6KA6*, *EPHA2*, *FOXO3*, *STK3*, *CDC2L2*, *KSR2*, *CCNT2*, *FBXW7*.

| $k$ | $\tilde{\pi}(M)$ | $W(M)$ | $M$               |
|-----|------------------|--------|-------------------|
| 2   | 56%              | 75     | <i>ATM TP53</i>   |
|     | 1%               | 67     | <i>PAK4 TP53</i>  |
|     | 1%               | 66     | <i>IGFR1 TP53</i> |

**Table 3:** Results for Lung mutation data with  $k = 2$  after removing the set (*EGFR*, *KRAS*, *STK11*) from analysis.  $M$  is the set of genes,  $\tilde{\pi}(M)$  is the frequency of the set in the sample obtained with the MCMC, and  $W(M)$  is the weight of the set.

## D.2 Results for Glioblastoma

Table 4 reports the result obtained for Glioblastoma data with  $k = 2$  and  $k = 3$ . Table 5 reports the results for  $k = 2$  obtained after removing the set (*CDKN2B*, *RB1*, *CDK4*). Table 6 reports the results for  $k = 2$  obtained after removing the sets (*CDKN2B*, *RB1*, *CDK4*) and the set (*CDKN2A*, *TP53*). In all tables  $k$  is the size of set,  $M$  is the set of genes,  $\tilde{\pi}(M)$  is the frequency of the set in the sample obtained with the MCMC, and  $W(M)$  is the weight of the set.

| $k$ | $\tilde{\pi}(M)$ | $W(M)$ | $M$                              |
|-----|------------------|--------|----------------------------------|
| 2   | 18.4%            | 54     | <i>CYP27B1 CDKN2B</i>            |
|     | 10.9%            | 53     | <i>MG<sub>1</sub> CDKN2B</i>     |
|     | 9.7%             | 53     | <i>TP53 CDKN2B</i>               |
|     | 9.6%             | 53     | <i>CDKN2A TP53</i>               |
|     | 7.2%             | 52     | <i>EGFR TP53</i>                 |
|     | 5.8%             | 52     | <i>MG<sub>2</sub> CDKN2B</i>     |
|     | 5.4%             | 52     | <i>MTAP TP53</i>                 |
|     | 4.9%             | 51     | <i>OS9 CDKN2B</i>                |
|     | 4.9%             | 51     | <i>RB1 CDKN2B</i>                |
|     | 2.6%             | 50     | <i>NF1 EGFR</i>                  |
|     | 1.6%             | 49     | <i>PTEN CDKN2A</i>               |
|     | 1.6%             | 48     | <i>SEC61G TP53</i>               |
|     | 1.4%             | 49     | <i>DTX3 CDKN2B</i>               |
|     | 1.2%             | 48     | <i>MG<sub>3</sub> CDKN2B</i>     |
|     | 1.2%             | 48     | <i>PTEN MTAP</i>                 |
| 3   | 9.7%             | 62     | <i>CYP27B1 RB1 CDKN2B</i>        |
|     | 5.7%             | 61     | <i>MG<sub>1</sub> RB1 CDKN2B</i> |
|     | 3.1%             | 60     | <i>MG<sub>2</sub> RB1 CDKN2B</i> |
|     | 2.1%             | 59     | <i>OS9 RB1 CDKN2B</i>            |
|     | 1.4%             | 57     | <i>MTAP CYP27B1 RB1</i>          |

**Table 4:** Results for Glioblastoma mutation data with  $k = 2$  and  $k = 3$ .  $M$  is the set of genes,  $\tilde{\pi}(M)$  is the frequency of the set in the sample obtained with the MCMC, and  $W(M)$  is the weight of the set.  $MG_1$ ,  $MG_2$  and  $MG_3$  are metagenes corresponding to the following sets:  $MG_1 = (TSFM, MARCH9, TSPAN31, FAM119B, METTL1, CDK4, CENTG1)$ ;  $MG_2 = (AVIL, CTDSP2)$ ;  $MG_3 = (SLC26A10, GEFT, PIP4K2C)$ .

## D.3 Results for Known Mutations on Multiple Cancer Type

Table 7 and reports the results obtained on the oncogenes mutations data with  $k = 8$ . Table 8 and reports the results obtained on the oncogenes mutations data with  $k = 10$ . In all tables  $k$  is the size of set,  $M$  is the

| $k$ | $\tilde{\pi}(M)$ | $W(M)$ | $M$                          |
|-----|------------------|--------|------------------------------|
| 2   | 30.1%            | 53     | <i>CDKN2A TP53</i>           |
|     | 19.8%            | 52     | <i>MTAP TP53</i>             |
|     | 18.6%            | 52     | <i>EGFR TP53</i>             |
|     | 6.8%             | 50     | <i>NF1 EGFR</i>              |
|     | 3.9%             | 50     | <i>PTEN CDKN2A</i>           |
|     | 3.4%             | 49     | <i>SEC61G TP53</i>           |
|     | 3%               | 48     | <i>CYP27B1 CDKN2A</i>        |
|     | 2.6%             | 48     | <i>PTEN MTAP</i>             |
|     | 1.7%             | 46     | <i>MG<sub>2</sub> CDKN2A</i> |
|     | 1.2%             | 47     | <i>CYP27B1 MTAP</i>          |
|     | 1%               | 47     | <i>OS9 CDKN2A</i>            |
|     | 1%               | 45     | <i>DTX3 CDKN2A</i>           |

**Table 5:** Results for Glioblastoma mutation data with  $k = 2$  after removing the set (*CDKN2B*, *RBI*, *CDK4*) from analysis.  $M$  is the set of genes,  $\tilde{\pi}(M)$  is the frequency of the set in the sample obtained with the MCMC, and  $W(M)$  is the weight of the set. See caption of Table 4 for the definition of  $MG_2$ .

| $k$ | $\tilde{\pi}(M)$ | $W(M)$ | $M$                 |
|-----|------------------|--------|---------------------|
| 2   | 44.3             | 50     | <i>NF1 EGFR</i>     |
|     | 16.9             | 48     | <i>PTEN MTAP</i>    |
|     | 9.3              | 47     | <i>CYP27B1 MTAP</i> |
|     | 3.2              | 45     | <i>AVIL MTAP</i>    |
|     | 2.4              | 44     | <i>PTEN EGFR</i>    |
|     | 2.0              | 43     | <i>IFNA21 PTEN</i>  |
|     | 1.8              | 44     | <i>OS9 MTAP</i>     |
|     | 1.3              | 42     | <i>MTAP NF1</i>     |

**Table 6:** Results for Glioblastoma mutation data with  $k = 2$  after removing the sets (*CDKN2B*, *RBI*, *CDK4*) and (*CDKN2A*, *TP53*) from analysis.  $M$  is the set of genes,  $\tilde{\pi}(M)$  is the frequency of the set in the sample obtained with the MCMC, and  $W(M)$  is the weight of the set. See caption of Table 4 for the definition of  $MG_2$ .

set of genes,  $\tilde{\pi}(M)$  is the frequency of the set in the sample obtained with the MCMC, and  $W(M)$  is the weight of the set.

#### D.4 Evaluation of MCMC sampling

To evaluate the MCMC sampling, we compared the distribution of weights  $W(M)$  for sets  $M$  sampled by MCMC and randomly sampled sets. If the MCMC approach was merely performing a random walk among the sets of size  $k$ , the two distributions would be similar. Figure 6 shows sets sampled randomly (a) and by the MCMC approach (b) for sets of size  $k = 3$  from the TCGA GBM dataset (The Cancer Genome Atlas Research Network, 2008). The two distributions are clearly different, with the value of  $W(M)$  being typically much larger for the sets sampled with the MCMC than for randomly sampled sets.



| $k$ | $\tilde{\pi}(M)$ | $W(M)$ | $M$                                                                       |
|-----|------------------|--------|---------------------------------------------------------------------------|
| 8   | 13.2             | 265    | <i>BRAF_600-601 EGFR_ECD EGFR_KD HRAS KRAS NRAS PIK3CA_HD PIK3CA_KD</i>   |
|     | 6.4              | 264    | <i>BRAF_600-601 EGFR_ECD EGFR_KD HRAS KIT KRAS NRAS PIK3CA_HD</i>         |
|     | 4.6              | 263    | <i>BRAF_600-601 EGFR_ECD EGFR_KD HRAS KIT KRAS NRAS PIK3CA_KD</i>         |
|     | 4.5              | 263    | <i>BRAF_600-601 EGFR_ECD EGFR_KD HRAS JAK2 KRAS NRAS PIK3CA_HD</i>        |
|     | 4.2              | 263    | <i>BRAF_600-601 EGFR_ECD EGFR_KD KIT KRAS NRAS PIK3CA_HD PIK3CA_KD</i>    |
|     | 4.1              | 263    | <i>BRAF_600-601 EGFR_ECD EGFR_KD FGFR1 HRAS KRAS NRAS PIK3CA_HD</i>       |
|     | 3.2              | 262    | <i>BRAF_600-601 EGFR_ECD EGFR_KD HRAS JAK2 KRAS NRAS PIK3CA_KD</i>        |
|     | 2.8              | 262    | <i>BRAF_600-601 EGFR_ECD EGFR_KD FGFR3 HRAS KRAS NRAS PIK3CA_HD</i>       |
|     | 2.7              | 262    | <i>BRAF_600-601 EGFR_ECD EGFR_KD FGFR1 KRAS NRAS PIK3CA_HD PIK3CA_KD</i>  |
|     | 2.5              | 261    | <i>BRAF_600-601 EGFR_ECD EGFR_KD HRAS KRAS NRAS PDGFRA PIK3CA_HD</i>      |
|     | 2.4              | 262    | <i>BRAF_600-601 EGFR_ECD EGFR_KD FGFR1 HRAS KRAS NRAS PIK3CA_KD</i>       |
|     | 2.1              | 262    | <i>BRAF_600-601 EGFR_ECD EGFR_KD ERBB2 HRAS KRAS NRAS PIK3CA_HD</i>       |
|     | 2.1              | 261    | <i>BRAF_600-601 EGFR_ECD EGFR_KD FGFR3 HRAS KRAS NRAS PIK3CA_KD</i>       |
|     | 2.0              | 261    | <i>BRAF_600-601 EGFR_ECD EGFR_KD JAK2 KIT KRAS NRAS PIK3CA_HD</i>         |
|     | 1.9              | 261    | <i>BRAF_600-601 EGFR_ECD EGFR_KD FGFR3 KRAS NRAS PIK3CA_HD PIK3CA_KD</i>  |
|     | 1.7              | 261    | <i>BRAF_600-601 EGFR_ECD EGFR_KD ERBB2 HRAS KRAS NRAS PIK3CA_KD</i>       |
|     | 1.5              | 261    | <i>BRAF_600-601 EGFR_ECD EGFR_KD FGFR1 KIT KRAS NRAS PIK3CA_HD</i>        |
|     | 1.5              | 260    | <i>BRAF_600-601 EGFR_ECD EGFR_KD KRAS NRAS PDGFRA PIK3CA_HD PIK3CA_KD</i> |
|     | 1.5              | 261    | <i>BRAF_600-601 EGFR_ECD EGFR_KD ERBB2 KRAS NRAS PIK3CA_HD PIK3CA_KD</i>  |
|     | 1.4              | 262    | <i>BRAF_600-601 EGFR_ECD EGFR_KD JAK2 KRAS NRAS PIK3CA_HD PIK3CA_KD</i>   |
|     | 1.3              | 260    | <i>BRAF_600-601 EGFR_ECD EGFR_KD FGFR3 KIT KRAS NRAS PIK3CA_HD</i>        |
|     | 1.1              | 260    | <i>BRAF_600-601 EGFR_ECD EGFR_KD ERBB2 KIT KRAS NRAS PIK3CA_HD</i>        |

**Table 7:** Results for oncogenes mutations data with  $k = 8$ .  $M$  is the set of genes,  $\tilde{\pi}(M)$  is the frequency of the set in the sample obtained with the MCMC, and  $W(M)$  is the weight of the set.

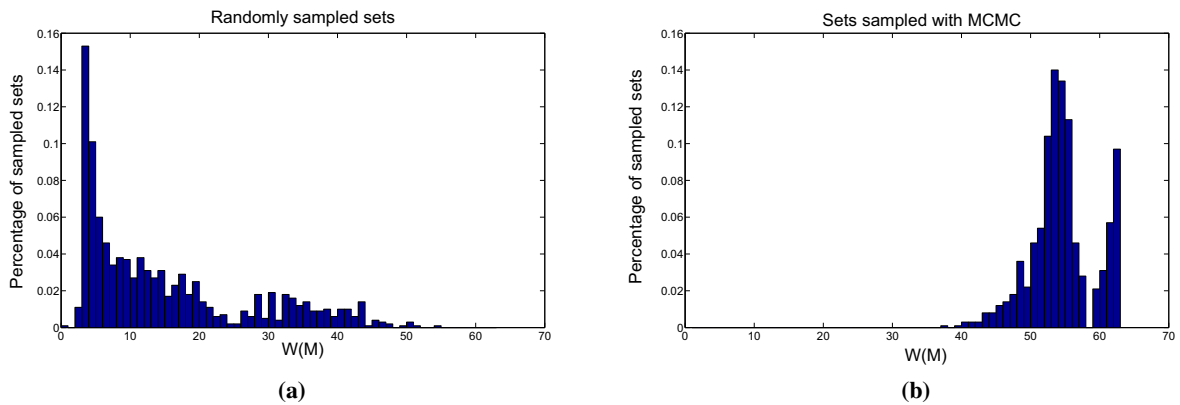

**Figure 6:** Distribution of number of samples with respect to  $W(M)$  for the GBM dataset with  $k = 3$  for (a) randomly sampled sets and (b) sets sampled with the MCMC.

| $k$ | $\tilde{\pi}(M)$ | $W(M)$ | $M$                                                                                      |
|-----|------------------|--------|------------------------------------------------------------------------------------------|
| 10  | 4.8%             | 272    | <i>BRAF_600-601 EGFR_ECD EGFR_KD FGFR1 HRAS<br/>KIT KRAS NRAS PIK3CA_HD PIK3CA_KD</i>    |
|     | 3.6%             | 272    | <i>BRAF_600-601 EGFR_ECD EGFR_KD HRAS JAK2<br/>KIT KRAS NRAS PIK3CA_HD PIK3CA_KD</i>     |
|     | 3.4%             | 271    | <i>BRAF_600-601 EGFR_ECD EGFR_KD ERBB2 HRAS<br/>KIT KRAS NRAS PIK3CA_HD PIK3CA_KD</i>    |
|     | 3.4%             | 270    | <i>BRAF_600-601 EGFR_ECD EGFR_KD ERBB2 FGFR1<br/>HRAS KRAS NRAS PIK3CA_HD PIK3CA_KD</i>  |
|     | 3.2%             | 271    | <i>BRAF_600-601 EGFR_ECD EGFR_KD FGFR1 HRAS<br/>JAK2 KRAS NRAS PIK3CA_HD PIK3CA_KD</i>   |
|     | 3.1%             | 271    | <i>BRAF_600-601 EGFR_ECD EGFR_KD FGFR3 HRAS<br/>KIT KRAS NRAS PIK3CA_HD PIK3CA_KD</i>    |
|     | 2.7%             | 270    | <i>BRAF_600-601 EGFR_ECD EGFR_KD FGFR1 HRAS<br/>JAK2 KIT KRAS NRAS PIK3CA_HD</i>         |
|     | 2.5%             | 270    | <i>BRAF_600-601 EGFR_ECD EGFR_KD HRAS KIT<br/>KRAS NRAS PDGFRA PIK3CA_HD PIK3CA_KD</i>   |
|     | 2.4%             | 270    | <i>BRAF_600-601 EGFR_ECD EGFR_KD ERBB2 HRAS<br/>JAK2 KRAS NRAS PIK3CA_HD PIK3CA_KD</i>   |
|     | 2.4%             | 270    | <i>BRAF_600-601 EGFR_ECD EGFR_KD FGFR1 FGFR3<br/>HRAS KRAS NRAS PIK3CA_HD PIK3CA_KD</i>  |
|     | 1.6%             | 269    | <i>BRAF_600-601 EGFR_ECD EGFR_KD ERBB2 HRAS<br/>JAK2 KIT KRAS NRAS PIK3CA_HD</i>         |
|     | 1.6%             | 269    | <i>BRAF_600-601 EGFR_ECD EGFR_KD FGFR1 FGFR3<br/>HRAS KIT KRAS NRAS PIK3CA_HD</i>        |
|     | 1.5%             | 270    | <i>BRAF_600-601 EGFR_ECD EGFR_KD FGFR3 HRAS<br/>JAK2 KRAS NRAS PIK3CA_HD PIK3CA_KD</i>   |
|     | 1.4%             | 269    | <i>BRAF_600-601 EGFR_ECD EGFR_KD FGFR1 JAK2<br/>KIT KRAS NRAS PIK3CA_HD PIK3CA_KD</i>    |
|     | 1.4%             | 269    | <i>BRAF_600-601 EGFR_ECD EGFR_KD ERBB2 FGFR1<br/>HRAS KIT KRAS NRAS PIK3CA_HD</i>        |
|     | 1.3%             | 269    | <i>BRAF_600-601 EGFR_ECD EGFR_KD FGFR3 HRAS<br/>JAK2 KIT KRAS NRAS PIK3CA_HD</i>         |
|     | 1.2%             | 269    | <i>BRAF_600-601 EGFR_ECD EGFR_KD HRAS JAK2<br/>KRAS NRAS PDGFRA PIK3CA_HD PIK3CA_KD</i>  |
|     | 1.1%             | 268    | <i>BRAF_600-601 EGFR_ECD EGFR_KD FGFR1 HRAS<br/>KIT KRAS NRAS PDGFRA PIK3CA_HD</i>       |
|     | 1.1%             | 268    | <i>BRAF_600-601 EGFR_ECD EGFR_KD FGFR1 FGFR3<br/>HRAS JAK2 KRAS NRAS PIK3CA_HD</i>       |
|     | 1.1%             | 268    | <i>BRAF_600-601 EGFR_ECD EGFR_KD ERBB2 HRAS<br/>JAK2 KIT KRAS NRAS PIK3CA_KD</i>         |
|     | 1.0%             | 269    | <i>BRAF_600-601 EGFR_ECD EGFR_KD FGFR1 HRAS<br/>KRAS NRAS PDGFRA PIK3CA_HD PIK3CA_KD</i> |

**Table 8:** Results for oncogenes mutations data with  $k = 10$ .  $M$  is the set of genes,  $\tilde{\pi}(M)$  is the frequency of the set in the sample obtained with the MCMC, and  $W(M)$  is the weight of the set.
